# Supplementary material for: The Effects of PPAR Stimulation on Cardiac Metabolic Pathways in Barth Syndrome Mice
Source: PubMed Central journal article supplement (PMC5904206; doi:10.3389/fphar.2018.00318), 2018-04-11
Supplement: Image_1.pdf [file Image_1.pdf]

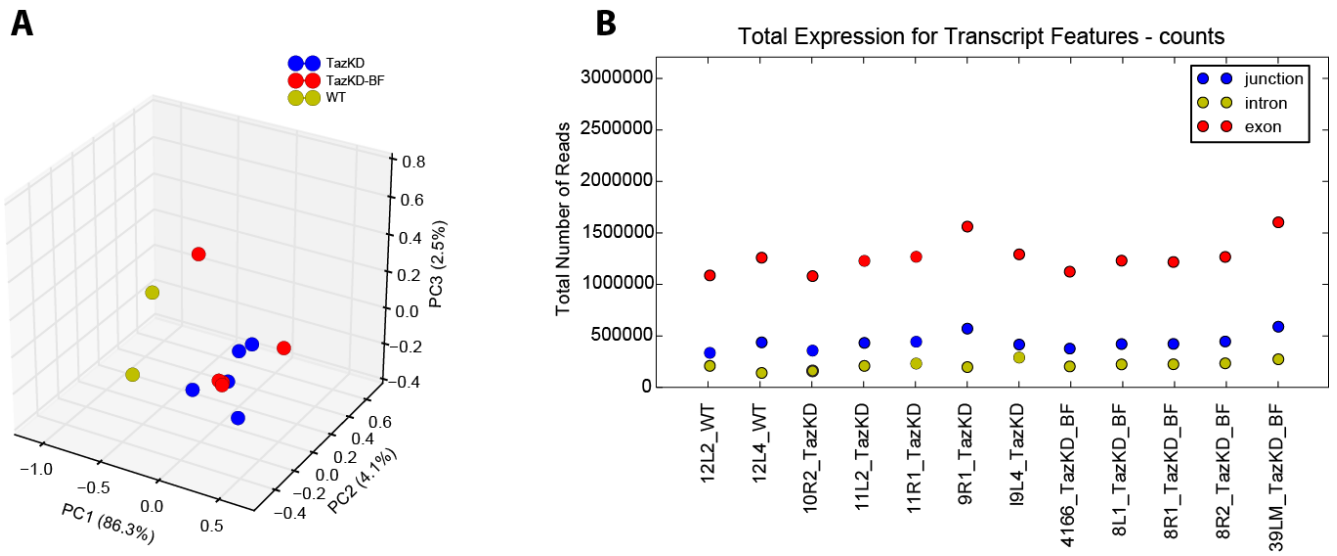

**Supplemental Figure 1.** A – Dimensionality reduction with principal component analysis with Z-score normalization. B – Counts of total transcript features for all individual samples submitted for RNA-seq.
