# Supplementary material for: The Effects of PPAR Stimulation on Cardiac Metabolic Pathways in Barth Syndrome Mice
Source: PubMed Central journal article supplement (PMC5904206; doi:10.3389/fphar.2018.00318), 2018-04-11
Supplement: Image_2.pdf [file Image_2.pdf]

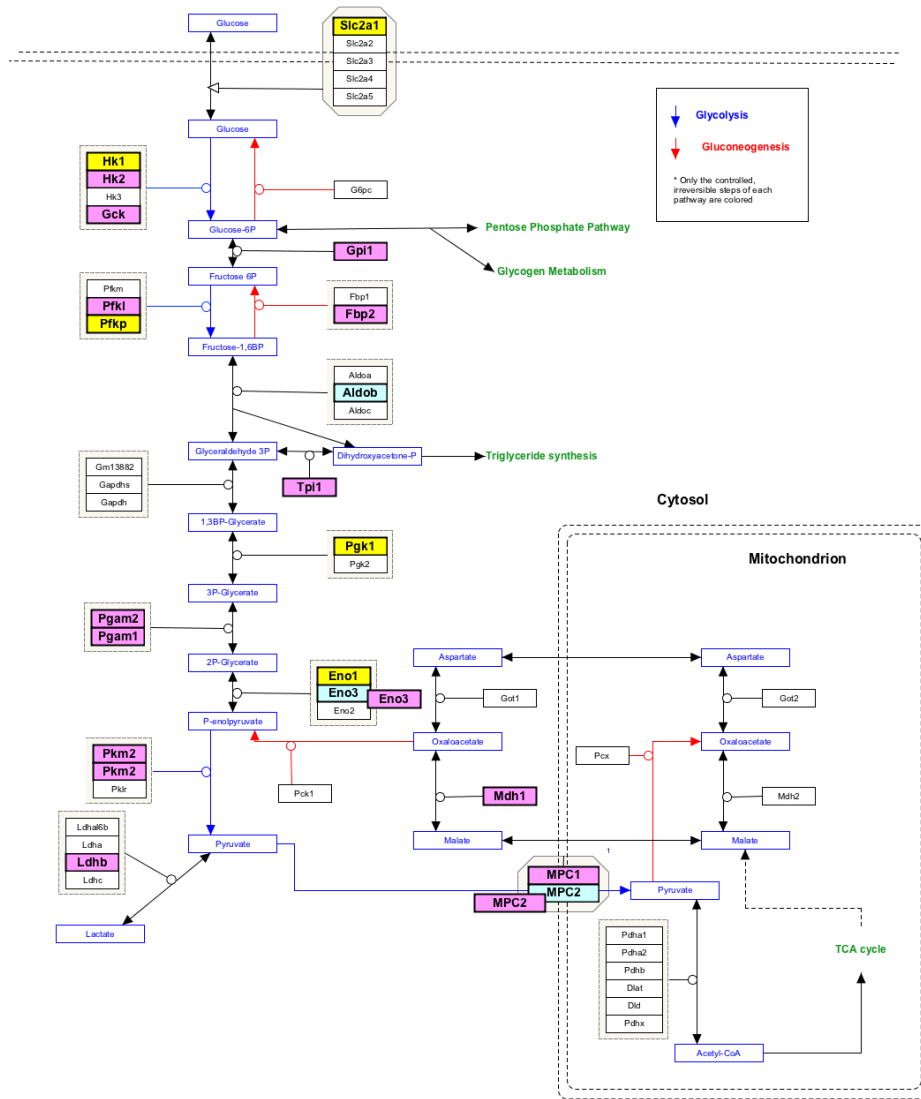

**Supplemental Figure 2.** Glycolysis and gluconeogenesis pathway (WP157). For supplementary figures 2-11: a yellow color highlights the genes, which are upregulated in TazKD group compared to WT controls; a purple color highlights the genes, which are upregulated in BF-treated TazKD group compared to untreated TazKD group; blue highlights the genes, which are downregulated in untreated TazKD group, but upregulated in BF-treated TazKD group. Pathways are derived from WikiPathways (<http://www.wikipathways.org>).
