# Supplementary material for: The Effects of PPAR Stimulation on Cardiac Metabolic Pathways in Barth Syndrome Mice
Source: PubMed Central journal article supplement (PMC5904206; doi:10.3389/fphar.2018.00318), 2018-04-11
Supplement: Image_3.pdf [file Image_3.pdf]

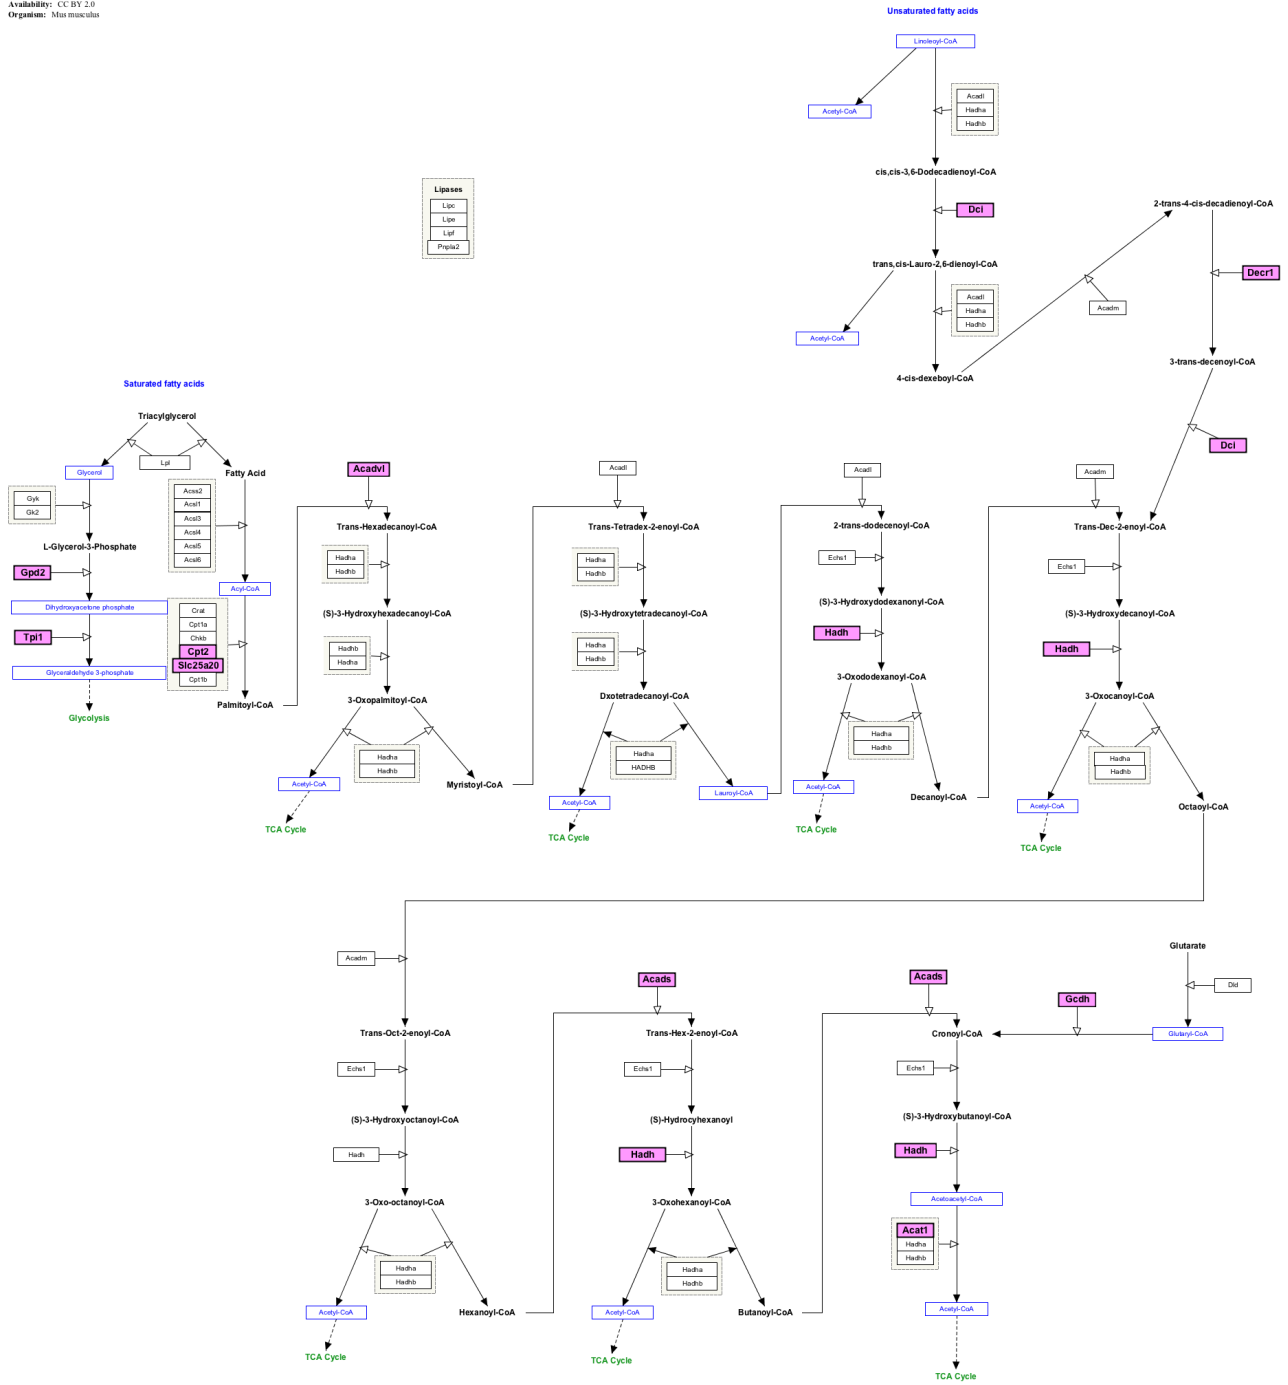

Supplemental Figure 3. Fatty acid beta-oxidation pathway (WP1269).
