# Supplementary material for: The Effects of PPAR Stimulation on Cardiac Metabolic Pathways in Barth Syndrome Mice
Source: PubMed Central journal article supplement (PMC5904206; doi:10.3389/fphar.2018.00318), 2018-04-11
Supplement: Image_4.pdf [file Image_4.pdf]

Title: Electron Transport Chain WP295  
 Last modified: 5/2/2013  
 Organism: Mus musculus

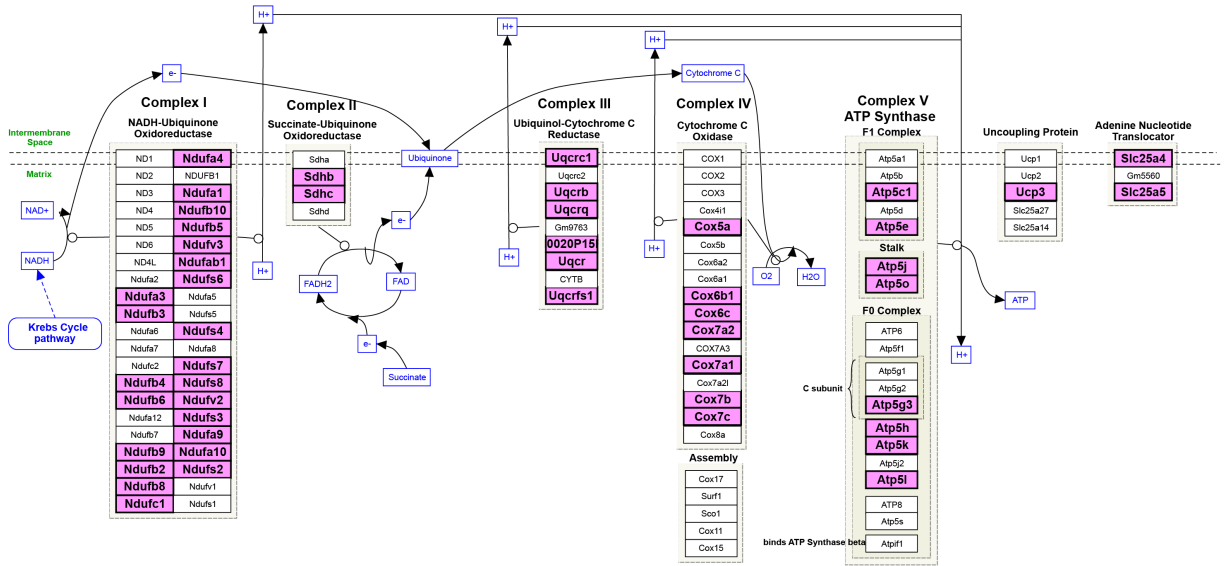

**Supplemental Figure 4.** Oxidative phosphorylation (WP1248) and electron transport chain (WP295).
