# Supplementary material for: The Effects of PPAR Stimulation on Cardiac Metabolic Pathways in Barth Syndrome Mice
Source: PubMed Central journal article supplement (PMC5904206; doi:10.3389/fphar.2018.00318), 2018-04-11
Supplement: Image_5.pdf [file Image_5.pdf]

Title: Fatty Acid Biosynthesis WP336  
Availability: CC BY 2.0  
Organism: Mus musculus

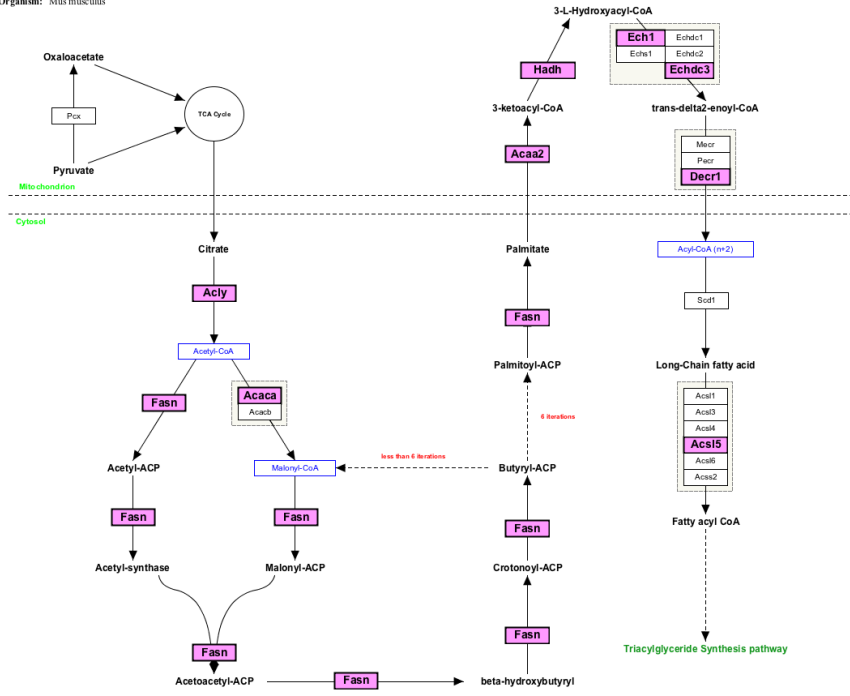

Supplemental Figure 5. Fatty acid biosynthesis pathway (WP336).
