# Supplementary material for: The Effects of PPAR Stimulation on Cardiac Metabolic Pathways in Barth Syndrome Mice
Source: PubMed Central journal article supplement (PMC5904206; doi:10.3389/fphar.2018.00318), 2018-04-11
Supplement: Image_6.pdf [file Image_6.pdf]

Title: Eukaryotic Transcription Initiation 1,2  
 Organism: Mus musculus

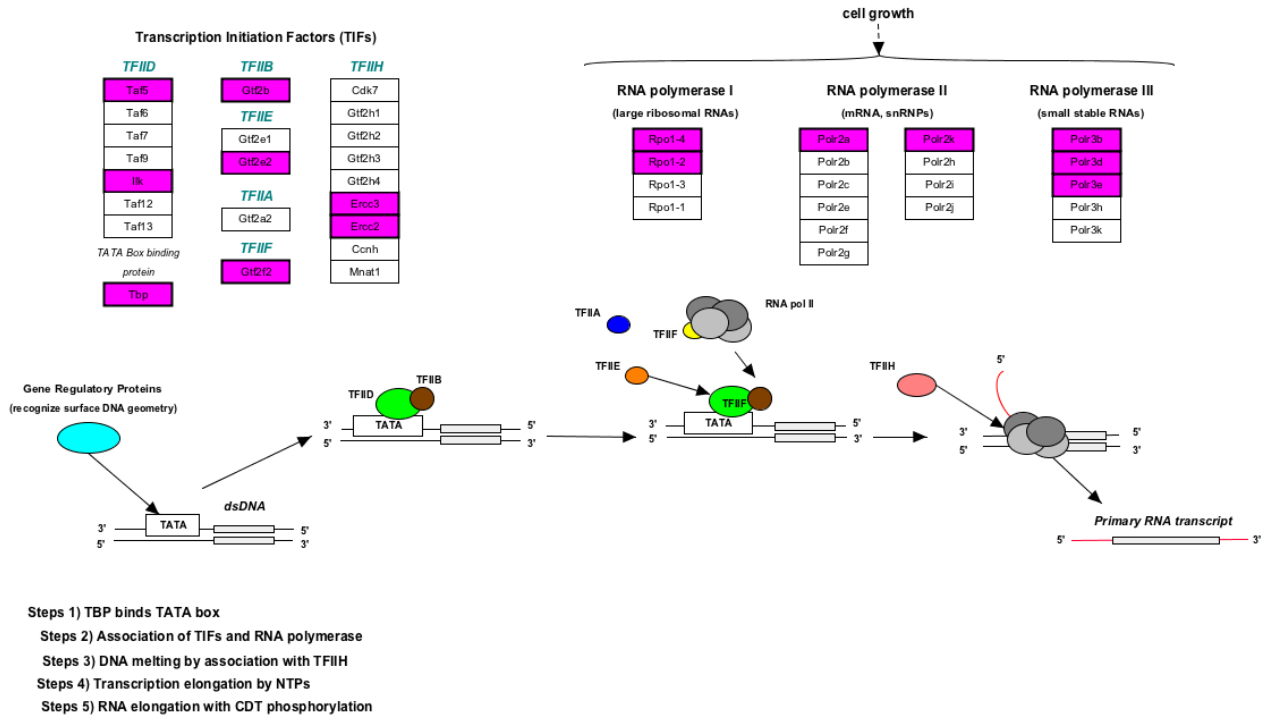

Supplemental Figure 6. Eukaryotic transcription initiation pathway (WP567).
