# Supplementary material for: The Effects of PPAR Stimulation on Cardiac Metabolic Pathways in Barth Syndrome Mice
Source: PubMed Central journal article supplement (PMC5904206; doi:10.3389/fphar.2018.00318), 2018-04-11
Supplement: Image_7.pdf [file Image_7.pdf]

Title: mRNA processing  
Organism: Mammals

Note: New participating members shown at each step  
right click on blue text for detailed information

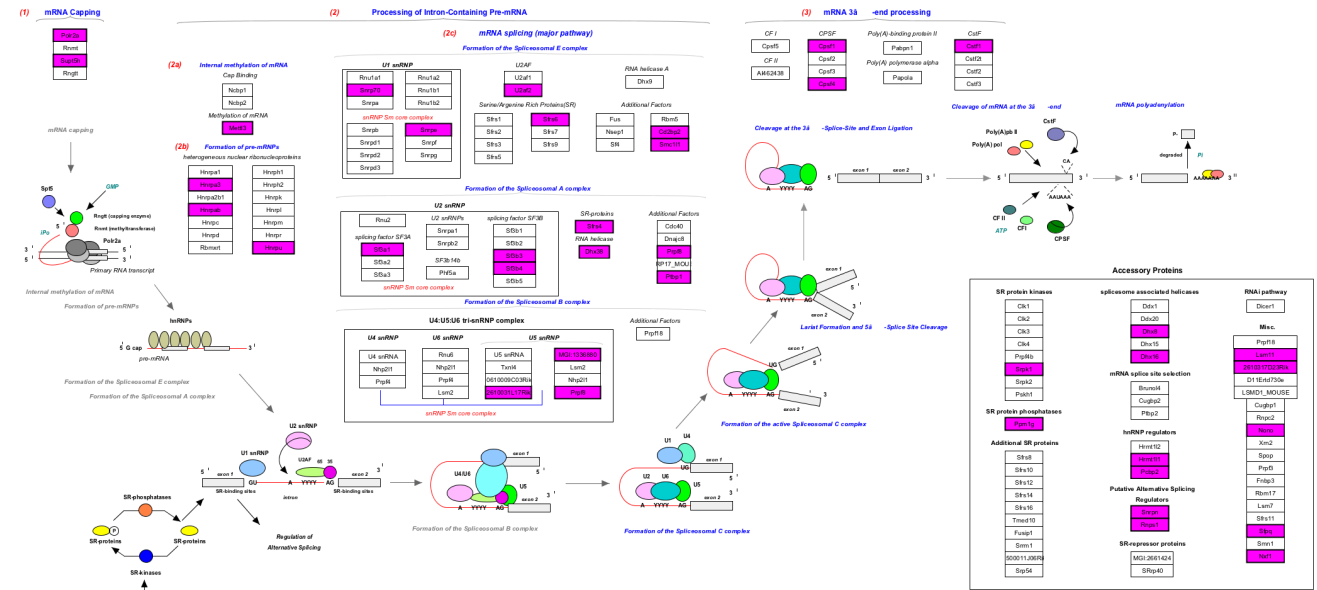

| InterPro Domain Containing: | RNA-binding region RNP-1 (RNA recognition motif) | Gene Ontology: RNA Binding |                |        |          |          |        |
|-----------------------------|--------------------------------------------------|----------------------------|----------------|--------|----------|----------|--------|
| 061030920.9RA               | 24101041.9RA                                     | 38504251.9RA               | A130055220.9RA | Cpfl18 | Maif1a1  | Ublaf1a2 | Rps27  |
| 061030920.9RA               | 24101041.9RA                                     | 38504251.9RA               | A130055220.9RA | Cpfl18 | Maif1a2  | V1nc17   | Rps28  |
| 061030920.9RA               | 24101041.9RA                                     | 38504251.9RA               | A130055220.9RA | Cpfl18 | Maif1a3  | W69      | Rps29  |
| 061030920.9RA               | 24101041.9RA                                     | 38504251.9RA               | A130055220.9RA | Cpfl18 | Maif1a4  | W69      | Rps30  |
| 061030920.9RA               | 24101041.9RA                                     | 38504251.9RA               | A130055220.9RA | Cpfl18 | Maif1a5  | W69      | Rps31  |
| 061030920.9RA               | 24101041.9RA                                     | 38504251.9RA               | A130055220.9RA | Cpfl18 | Maif1a6  | W69      | Rps32  |
| 061030920.9RA               | 24101041.9RA                                     | 38504251.9RA               | A130055220.9RA | Cpfl18 | Maif1a7  | W69      | Rps33  |
| 061030920.9RA               | 24101041.9RA                                     | 38504251.9RA               | A130055220.9RA | Cpfl18 | Maif1a8  | W69      | Rps34  |
| 061030920.9RA               | 24101041.9RA                                     | 38504251.9RA               | A130055220.9RA | Cpfl18 | Maif1a9  | W69      | Rps35  |
| 061030920.9RA               | 24101041.9RA                                     | 38504251.9RA               | A130055220.9RA | Cpfl18 | Maif1a10 | W69      | Rps36  |
| 061030920.9RA               | 24101041.9RA                                     | 38504251.9RA               | A130055220.9RA | Cpfl18 | Maif1a11 | W69      | Rps37  |
| 061030920.9RA               | 24101041.9RA                                     | 38504251.9RA               | A130055220.9RA | Cpfl18 | Maif1a12 | W69      | Rps38  |
| 061030920.9RA               | 24101041.9RA                                     | 38504251.9RA               | A130055220.9RA | Cpfl18 | Maif1a13 | W69      | Rps39  |
| 061030920.9RA               | 24101041.9RA                                     | 38504251.9RA               | A130055220.9RA | Cpfl18 | Maif1a14 | W69      | Rps40  |
| 061030920.9RA               | 24101041.9RA                                     | 38504251.9RA               | A130055220.9RA | Cpfl18 | Maif1a15 | W69      | Rps41  |
| 061030920.9RA               | 24101041.9RA                                     | 38504251.9RA               | A130055220.9RA | Cpfl18 | Maif1a16 | W69      | Rps42  |
| 061030920.9RA               | 24101041.9RA                                     | 38504251.9RA               | A130055220.9RA | Cpfl18 | Maif1a17 | W69      | Rps43  |
| 061030920.9RA               | 24101041.9RA                                     | 38504251.9RA               | A130055220.9RA | Cpfl18 | Maif1a18 | W69      | Rps44  |
| 061030920.9RA               | 24101041.9RA                                     | 38504251.9RA               | A130055220.9RA | Cpfl18 | Maif1a19 | W69      | Rps45  |
| 061030920.9RA               | 24101041.9RA                                     | 38504251.9RA               | A130055220.9RA | Cpfl18 | Maif1a20 | W69      | Rps46  |
| 061030920.9RA               | 24101041.9RA                                     | 38504251.9RA               | A130055220.9RA | Cpfl18 | Maif1a21 | W69      | Rps47  |
| 061030920.9RA               | 24101041.9RA                                     | 38504251.9RA               | A130055220.9RA | Cpfl18 | Maif1a22 | W69      | Rps48  |
| 061030920.9RA               | 24101041.9RA                                     | 38504251.9RA               | A130055220.9RA | Cpfl18 | Maif1a23 | W69      | Rps49  |
| 061030920.9RA               | 24101041.9RA                                     | 38504251.9RA               | A130055220.9RA | Cpfl18 | Maif1a24 | W69      | Rps50  |
| 061030920.9RA               | 24101041.9RA                                     | 38504251.9RA               | A130055220.9RA | Cpfl18 | Maif1a25 | W69      | Rps51  |
| 061030920.9RA               | 24101041.9RA                                     | 38504251.9RA               | A130055220.9RA | Cpfl18 | Maif1a26 | W69      | Rps52  |
| 061030920.9RA               | 24101041.9RA                                     | 38504251.9RA               | A130055220.9RA | Cpfl18 | Maif1a27 | W69      | Rps53  |
| 061030920.9RA               | 24101041.9RA                                     | 38504251.9RA               | A130055220.9RA | Cpfl18 | Maif1a28 | W69      | Rps54  |
| 061030920.9RA               | 24101041.9RA                                     | 38504251.9RA               | A130055220.9RA | Cpfl18 | Maif1a29 | W69      | Rps55  |
| 061030920.9RA               | 24101041.9RA                                     | 38504251.9RA               | A130055220.9RA | Cpfl18 | Maif1a30 | W69      | Rps56  |
| 061030920.9RA               | 24101041.9RA                                     | 38504251.9RA               | A130055220.9RA | Cpfl18 | Maif1a31 | W69      | Rps57  |
| 061030920.9RA               | 24101041.9RA                                     | 38504251.9RA               | A130055220.9RA | Cpfl18 | Maif1a32 | W69      | Rps58  |
| 061030920.9RA               | 24101041.9RA                                     | 38504251.9RA               | A130055220.9RA | Cpfl18 | Maif1a33 | W69      | Rps59  |
| 061030920.9RA               | 24101041.9RA                                     | 38504251.9RA               | A130055220.9RA | Cpfl18 | Maif1a34 | W69      | Rps60  |
| 061030920.9RA               | 24101041.9RA                                     | 38504251.9RA               | A130055220.9RA | Cpfl18 | Maif1a35 | W69      | Rps61  |
| 061030920.9RA               | 24101041.9RA                                     | 38504251.9RA               | A130055220.9RA | Cpfl18 | Maif1a36 | W69      | Rps62  |
| 061030920.9RA               | 24101041.9RA                                     | 38504251.9RA               | A130055220.9RA | Cpfl18 | Maif1a37 | W69      | Rps63  |
| 061030920.9RA               | 24101041.9RA                                     | 38504251.9RA               | A130055220.9RA | Cpfl18 | Maif1a38 | W69      | Rps64  |
| 061030920.9RA               | 24101041.9RA                                     | 38504251.9RA               | A130055220.9RA | Cpfl18 | Maif1a39 | W69      | Rps65  |
| 061030920.9RA               | 24101041.9RA                                     | 38504251.9RA               | A130055220.9RA | Cpfl18 | Maif1a40 | W69      | Rps66  |
| 061030920.9RA               | 24101041.9RA                                     | 38504251.9RA               | A130055220.9RA | Cpfl18 | Maif1a41 | W69      | Rps67  |
| 061030920.9RA               | 24101041.9RA                                     | 38504251.9RA               | A130055220.9RA | Cpfl18 | Maif1a42 | W69      | Rps68  |
| 061030920.9RA               | 24101041.9RA                                     | 38504251.9RA               | A130055220.9RA | Cpfl18 | Maif1a43 | W69      | Rps69  |
| 061030920.9RA               | 24101041.9RA                                     | 38504251.9RA               | A130055220.9RA | Cpfl18 | Maif1a44 | W69      | Rps70  |
| 061030920.9RA               | 24101041.9RA                                     | 38504251.9RA               | A130055220.9RA | Cpfl18 | Maif1a45 | W69      | Rps71  |
| 061030920.9RA               | 24101041.9RA                                     | 38504251.9RA               | A130055220.9RA | Cpfl18 | Maif1a46 | W69      | Rps72  |
| 061030920.9RA               | 24101041.9RA                                     | 38504251.9RA               | A130055220.9RA | Cpfl18 | Maif1a47 | W69      | Rps73  |
| 061030920.9RA               | 24101041.9RA                                     | 38504251.9RA               | A130055220.9RA | Cpfl18 | Maif1a48 | W69      | Rps74  |
| 061030920.9RA               | 24101041.9RA                                     | 38504251.9RA               | A130055220.9RA | Cpfl18 | Maif1a49 | W69      | Rps75  |
| 061030920.9RA               | 24101041.9RA                                     | 38504251.9RA               | A130055220.9RA | Cpfl18 | Maif1a50 | W69      | Rps76  |
| 061030920.9RA               | 24101041.9RA                                     | 38504251.9RA               | A130055220.9RA | Cpfl18 | Maif1a51 | W69      | Rps77  |
| 061030920.9RA               | 24101041.9RA                                     | 38504251.9RA               | A130055220.9RA | Cpfl18 | Maif1a52 | W69      | Rps78  |
| 061030920.9RA               | 24101041.9RA                                     | 38504251.9RA               | A130055220.9RA | Cpfl18 | Maif1a53 | W69      | Rps79  |
| 061030920.9RA               | 24101041.9RA                                     | 38504251.9RA               | A130055220.9RA | Cpfl18 | Maif1a54 | W69      | Rps80  |
| 061030920.9RA               | 24101041.9RA                                     | 38504251.9RA               | A130055220.9RA | Cpfl18 | Maif1a55 | W69      | Rps81  |
| 061030920.9RA               | 24101041.9RA                                     | 38504251.9RA               | A130055220.9RA | Cpfl18 | Maif1a56 | W69      | Rps82  |
| 061030920.9RA               | 24101041.9RA                                     | 38504251.9RA               | A130055220.9RA | Cpfl18 | Maif1a57 | W69      | Rps83  |
| 061030920.9RA               | 24101041.9RA                                     | 38504251.9RA               | A130055220.9RA | Cpfl18 | Maif1a58 | W69      | Rps84  |
| 061030920.9RA               | 24101041.9RA                                     | 38504251.9RA               | A130055220.9RA | Cpfl18 | Maif1a59 | W69      | Rps85  |
| 061030920.9RA               | 24101041.9RA                                     | 38504251.9RA               | A130055220.9RA | Cpfl18 | Maif1a60 | W69      | Rps86  |
| 061030920.9RA               | 24101041.9RA                                     | 38504251.9RA               | A130055220.9RA | Cpfl18 | Maif1a61 | W69      | Rps87  |
| 061030920.9RA               | 24101041.9RA                                     | 38504251.9RA               | A130055220.9RA | Cpfl18 | Maif1a62 | W69      | Rps88  |
| 061030920.9RA               | 24101041.9RA                                     | 38504251.9RA               | A130055220.9RA | Cpfl18 | Maif1a63 | W69      | Rps89  |
| 061030920.9RA               | 24101041.9RA                                     | 38504251.9RA               | A130055220.9RA | Cpfl18 | Maif1a64 | W69      | Rps90  |
| 061030920.9RA               | 24101041.9RA                                     | 38504251.9RA               | A130055220.9RA | Cpfl18 | Maif1a65 | W69      | Rps91  |
| 061030920.9RA               | 24101041.9RA                                     | 38504251.9RA               | A130055220.9RA | Cpfl18 | Maif1a66 | W69      | Rps92  |
| 061030920.9RA               | 24101041.9RA                                     | 38504251.9RA               | A130055220.9RA | Cpfl18 | Maif1a67 | W69      | Rps93  |
| 061030920.9RA               | 24101041.9RA                                     | 38504251.9RA               | A130055220.9RA | Cpfl18 | Maif1a68 | W69      | Rps94  |
| 061030920.9RA               | 24101041.9RA                                     | 38504251.9RA               | A130055220.9RA | Cpfl18 | Maif1a69 | W69      | Rps95  |
| 061030920.9RA               | 24101041.9RA                                     | 38504251.9RA               | A130055220.9RA | Cpfl18 | Maif1a70 | W69      | Rps96  |
| 061030920.9RA               | 24101041.9RA                                     | 38504251.9RA               | A130055220.9RA | Cpfl18 | Maif1a71 | W69      | Rps97  |
| 061030920.9RA               | 24101041.9RA                                     | 38504251.9RA               | A130055220.9RA | Cpfl18 | Maif1a72 | W69      | Rps98  |
| 061030920.9RA               | 24101041.9RA                                     | 38504251.9RA               | A130055220.9RA | Cpfl18 | Maif1a73 | W69      | Rps99  |
| 061030920.9RA               | 24101041.9RA                                     | 38504251.9RA               | A130055220.9RA | Cpfl18 | Maif1a74 | W69      | Rps100 |

Supplemental Figure 7. mRNA processing pathway (WP310).
