# Supplementary material for: The Effects of PPAR Stimulation on Cardiac Metabolic Pathways in Barth Syndrome Mice
Source: PubMed Central journal article supplement (PMC5904206; doi:10.3389/fphar.2018.00318), 2018-04-11
Supplement: Image_9.pdf [file Image_9.pdf]

Title: G13 Signaling Pathway  
 Organism: Mus musculus

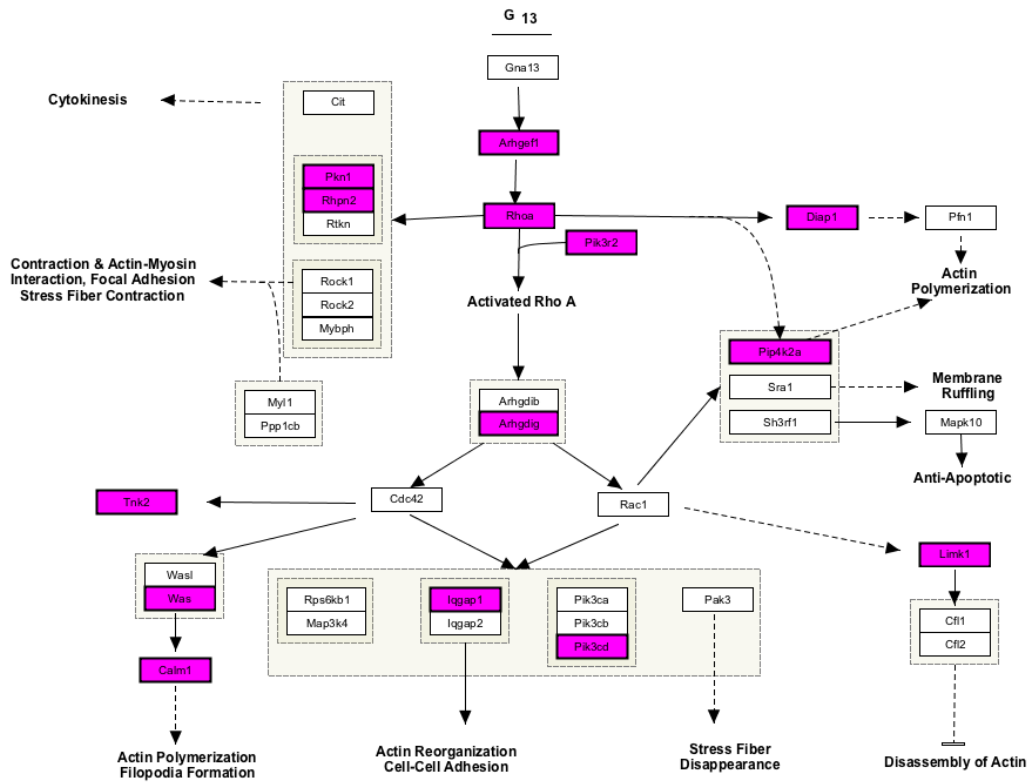

Supplemental Figure 9. G13 signaling pathway (WP298).
