# Supplementary material for: The Effects of PPAR Stimulation on Cardiac Metabolic Pathways in Barth Syndrome Mice
Source: PubMed Central journal article supplement (PMC5904206; doi:10.3389/fphar.2018.00318), 2018-04-11
Supplement: Image_10.pdf [file Image_10.pdf]

Title: Regulation of Actin Cytoskeleton  
 Organism: Mus musculus

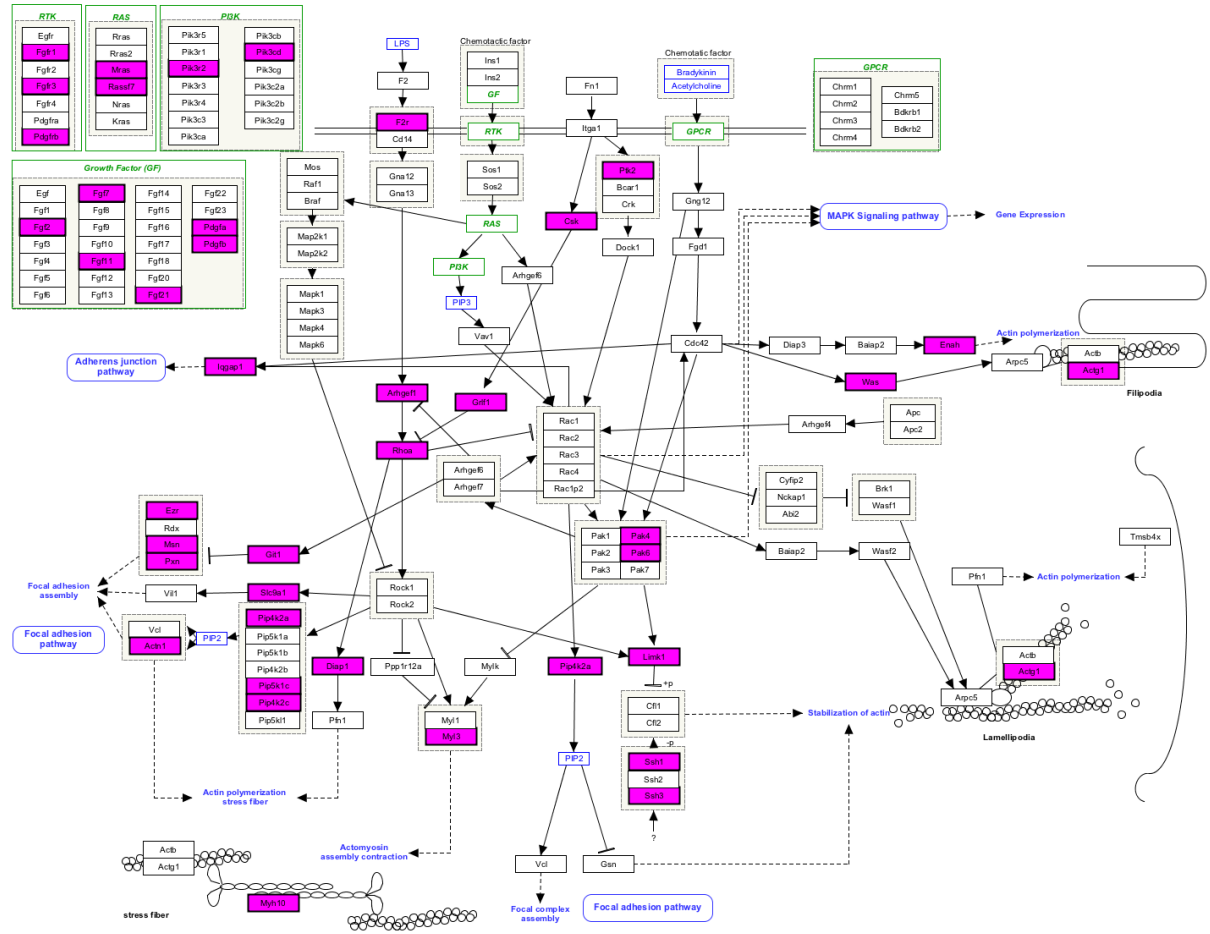

Supplemental Figure 10. Regulation of actin cytoskeleton pathway (WP523).
