# Supplementary material for: The Effects of PPAR Stimulation on Cardiac Metabolic Pathways in Barth Syndrome Mice
Source: Front Pharmacol. 2018 Apr 11;9:318. doi: 10.3389/fphar.2018.00318 (PMC5904206; doi:10.3389/fphar.2018.00318)
Supplement: Supplementary file 12 [file Image_8.pdf]

Title: One Carbon Metabolism WP435  
Organism: Mus musculus

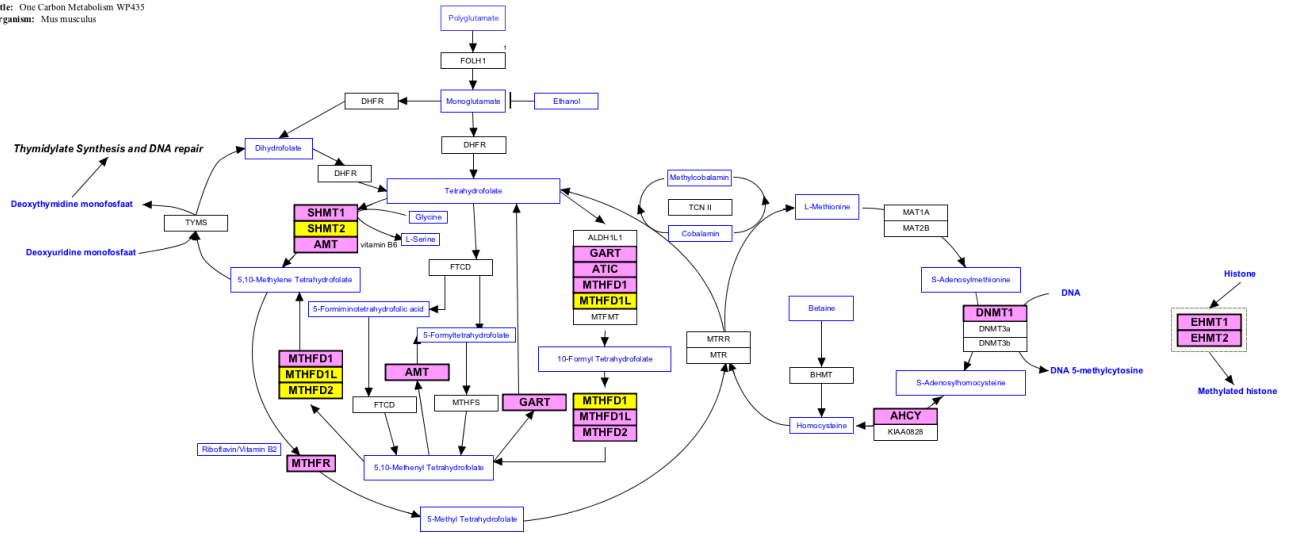

Supplemental Figure 8. One carbon metabolism (WP435)
