# Supplementary material for: The Effects of PPAR Stimulation on Cardiac Metabolic Pathways in Barth Syndrome Mice
Source: PubMed Central journal article supplement (PMC5904206; doi:10.3389/fphar.2018.00318), 2018-04-11
Supplement: Table_1.pdf [file Table_1.pdf]

## Supplemental Table 1

Echocardiographic indices of WT, untreated TazKD and BF-treated TazKD mice at 3, 5 and 7 months of age.

| Group       | WT          |             |              | TazKD                  |                           |                          | TazKD + BF  |              |              |
|-------------|-------------|-------------|--------------|------------------------|---------------------------|--------------------------|-------------|--------------|--------------|
| Age, months | 3           | 5           | 7            | 3                      | 5                         | 7                        | 3           | 5            | 7            |
| IVS;d       | 0.81±0.15   | 0.84±0.08   | 0.91±0.17    | 0.95±0.11*             | 1.04±0.18 <sup>#</sup>    | 0.95±0.10                | 0.89±0.14   | 1.04±0.16    | 0.87±0.11    |
| IVS;s       | 1.44±0.26   | 1.27±0.13   | 1.34±0.24    | 1.49±0.16              | 1.47±0.27                 | 1.34±0.14                | 1.46±0.17   | 1.50±0.24    | 1.29±0.14    |
| LVID;d      | 3.97±0.38   | 3.91±0.46   | 3.92±0.48    | 4.02±0.50              | 4.16±0.50                 | 4.19±0.52                | 3.80±0.17   | 3.48±0.25*   | 3.63±0.32*   |
| LVID;s      | 2.50±0.48   | 2.76±0.51   | 2.67±0.56    | 2.56±0.33              | 2.82±0.75                 | 3.21±0.55 <sup>#</sup>   | 2.35±0.18   | 2.32±0.39    | 2.43±0.21*   |
| LVPW;d      | 0.79±0.12   | 0.77±0.10   | 0.86±0.10    | 0.93±0.11 <sup>#</sup> | 0.84±0.12                 | 0.87±0.15                | 0.84±0.12   | 0.89±0.11    | 0.79±0.14    |
| LVPW;s      | 1.22±0.18   | 1.16±0.18   | 1.31±0.20    | 1.56±0.41 <sup>#</sup> | 1.19±0.19                 | 1.13±0.16 <sup>#</sup>   | 1.32±0.15   | 1.33±0.27    | 1.16±0.12    |
| EF          | 67.16±10.25 | 57.07±9.79  | 59.68±11.72  | 65.01±5.33             | 52.82±12.96               | 47.82±7.03 <sup>#</sup>  | 65.01±8.41  | 49.66±6.53   | 60.88±6.05*  |
| FS          | 37.27±7.51  | 29.83±6.69  | 30.16±7.85   | 36.07±5.42             | 27.11±8.49                | 23.75±4.66 <sup>#</sup>  | 36.07±5.42  | 25.37±3.90   | 32.56±9.29*  |
| LV Mass     | 92.72±14.87 | 91.41±17.87 | 103.37±19.42 | 95.81±14.82            | 114.90±29.09 <sup>#</sup> | 115.76±28.17             | 91.88±23.27 | 103.86±14.50 | 84.37±14.11* |
| LV Vol;d    | 69.69±15.55 | 67.76±19.67 | 67.70±20.61  | 64.60±4.94             | 78.18±21.77               | 84.28±13.14 <sup>#</sup> | 60.39±5.86  | 51.86±9.50*  | 55.78±11.38* |
| LV Vol;s    | 23.59±12.40 | 30.00±14.06 | 28.42±14.52  | 22.54±3.45             | 38.42±18.17               | 44.22±10.19 <sup>#</sup> | 20.86±4.96  | 26.07±5.94*  | 21.66±4.40*  |
| HR          | 438±90      | 414±67      | 462±91       | 353±59 <sup>#</sup>    | 395±71                    | 404±52                   | 339±73      | 393±66       | 410±68       |

Data are presented as means ± standard deviation.

IVS – diastolic (d) and systolic (s) interventricular septal wall thickness (mm);

LVID – diastolic (d) and systolic (s) left ventricular internal dimension (mm).

LVPW – diastolic (d) and systolic (s) left ventricular posterior wall thickness (mm).

EF – left ventricular ejection fraction (%).

FS – left ventricular fractional shortening (%).

LV Vol – diastolic (d) and systolic (s) left ventricular diastolic volume (microliters).

HR, heart rate (beats/min).

Statistically significant differences ( $p < 0.05$ ) are indicated: \*, between untreated and BF-treated TazKD mice of same age group; #, between untreated WT and TazKD mice of same age group.
